# Supplementary material
Source: PubMed Central journal article supplement (PMC4860669)
Supplement: Supp_Figure1.pdf [file Supp_Figure1.pdf]

## Supplementary Data

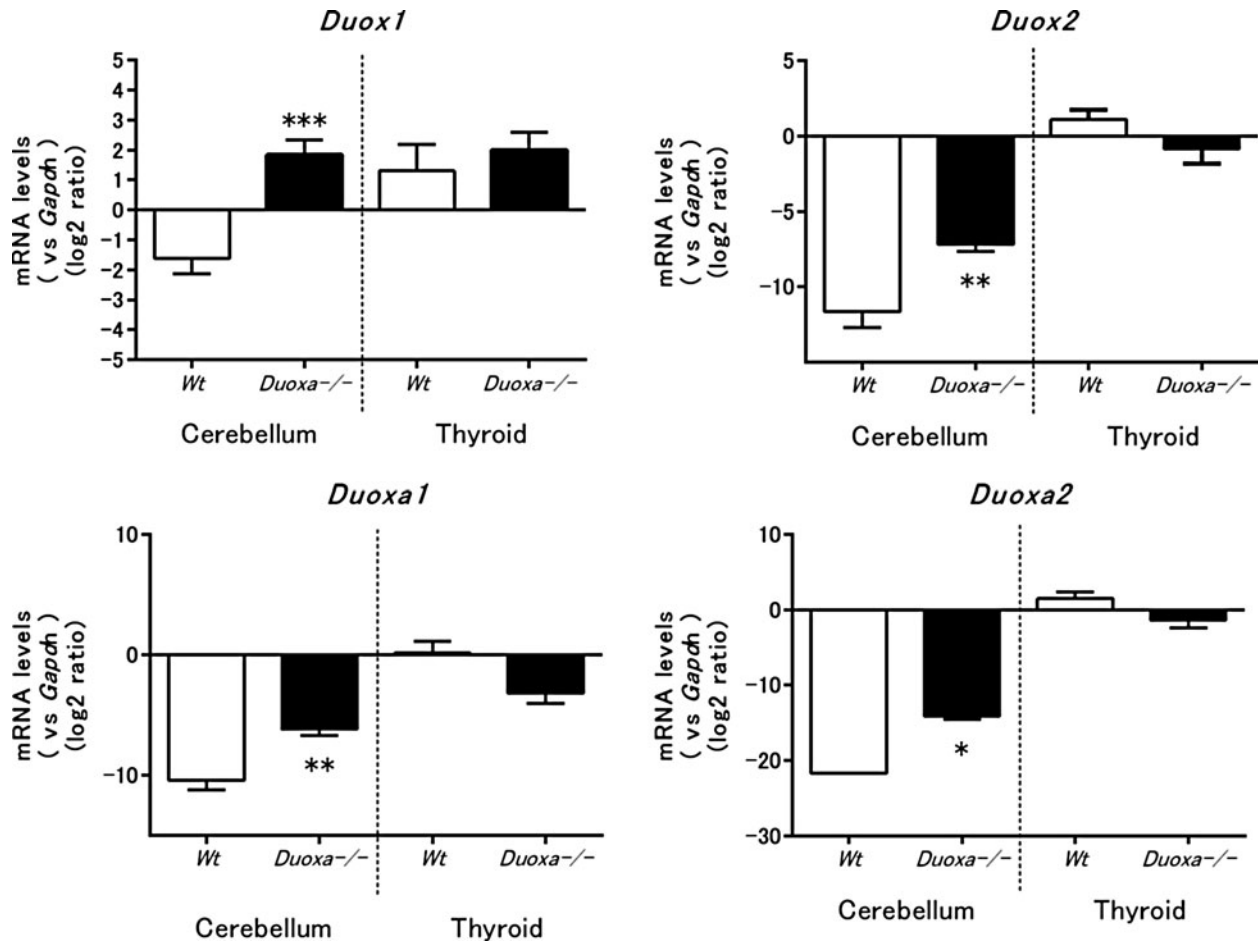

**SUPPLEMENTARY FIG. S1.** The mRNA levels of *Duox/Duoxa* families in *Wt* and *Duoxa*<sup>-/-</sup> mice. Expressions of *Duox 1*, *Duox2*, *Duoxa1*, and *Duoxa2* mRNA in the cerebellum and thyroid of *Wt* and *Duoxa*<sup>-/-</sup> mice on P25 ( $n=8$ ) were measured using quantitative real-time RT-PCR. The mRNA expression levels of *Duox1*, *Duox2*, *Duoxa1*, and *Duoxa2* in the cerebellum were lower compared with those in the thyroid. *Duox1* mRNA level was upregulated in *Duoxa*<sup>-/-</sup> mice. The expression level was normalized to the *Gapdh* mRNA expression levels. Data are presented as mean  $\pm$  SEM. \*\*\* $p < 0.001$  determined by Student's *t*-test compared with *Wt* mice.
