# Supplementary material
Source: PubMed Central journal article supplement (PMC4860669)
Supplement: Supp_Figure2.pdf [file Supp_Figure2.pdf]

## A: Cerebellum

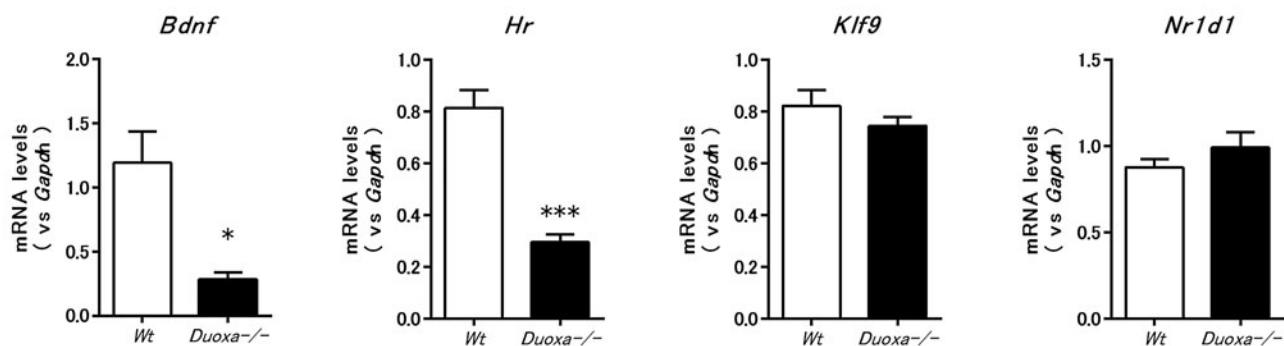

## B: Cortex

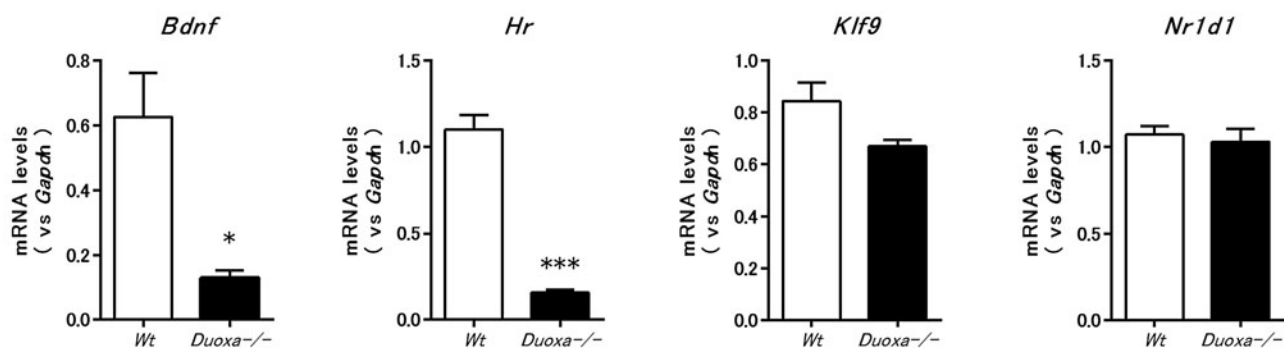

## C: Liver

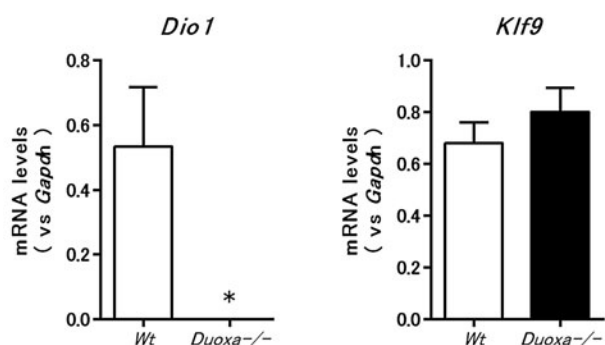

**SUPPLEMENTARY FIG. S2.** The mRNA levels of thyroid hormone-responsive genes in *Wt* and *Duoxa*<sup>-/-</sup> mice. Expressions of *Bdnf*, *Hr*, and *Klf9* in the cerebellum (A), *Bdnf*, *Hr*, *Klf9*, and *Nr1d1* in the cortex (B), *Dio1* and *Klf9* in the liver (C) were analyzed by quantitative real-time RT-PCR. Tissues were collected from four mice per genotypes on P25. *Bdnf* and *Hr* were low levels in both cerebellum and cortex of *Duoxa*<sup>-/-</sup> mice. However, there was no difference in expression of *Klf9* and *Nr1d1*. *Dio1* expression level decreased significantly in *Duoxa*<sup>-/-</sup> mice liver. The expression level was normalized to the *Gapdh* mRNA expression levels. Data are presented as mean  $\pm$  SEM. \* $p < 0.05$ ; \*\* $p < 0.01$ ; \*\*\* $p < 0.001$  determined by Student's *t*-test compared with *Wt* mice.
