# Supplementary material
Source: PubMed Central journal article supplement (PMC4860669)
Supplement: Supp_Table1.pdf [file Supp_Table1.pdf]

SUPPLEMENTARY TABLE S1. REAL-TIME TAQMAN CONTEXT SEQUENCES

| <i>Gene name</i>                                   | <i>Gene symbol</i> | <i>Assay ID</i> | <i>Context sequence</i>           |
|----------------------------------------------------|--------------------|-----------------|-----------------------------------|
| dual oxidase 1                                     | <i>Duox1</i>       | Mm01328685_m1   | GAG TGG AAG CTT TGG AGT GGC AGG G |
| dual oxidase 2                                     | <i>Duox2</i>       | Mm01326247_m1   | TCA CCA TGA TGC GGT CCT TCA TTG A |
| dual oxidase maturation factor 1                   | <i>Duoxa1</i>      | Mm01269312_m1   | TGT GAT CCT GGC TGT GAA CTT CAG T |
| dual oxidase maturation factor 2                   | <i>Duoxa2</i>      | Mm00470560_m1   | GCA CTC GCG CTG GTT CTG GTT GGT G |
| brain derived neurotrophic factor                  | <i>Bdnf</i>        | Mm04230607_s1   | GTG GTC AGT GGC TGG CTC TCT TAC C |
| hairless                                           | <i>Hr</i>          | Mm00498963_m1   | TCT CCA GAT GGT GTG CCC AGC TGG A |
| kruppel-like factor 9                              | <i>Klf9</i>        | Mm00495172_m1   | ACA GAG TGC ATA CAG GTG AAC GGC C |
| deiodinase, iodothyronine, type I                  | <i>Dio1</i>        | Mm00839358_m1   | AAG CTC ACG CCA CAG ATG GCT GGG C |
| nuclear receptor subfamily 1,<br>group D, member 1 | <i>Nr1d1</i>       | Mm00520708_m1   | ACA ACA CAG GTG GTG TTA TCA CCT A |
| glyceraldehyde-3-phosphate<br>dehydrogenase        | <i>Gapdh</i>       | Mm99999915_g1   | GGT GTG AAC GGA TTT GGC CGT ATT G |
